# Supplementary material for: Inhibiting CSF1R signaling reduces disc degeneration and discogenic back pain
Source: Research Square preprint supplement (doi:10.21203/rs.3.rs-5647673/v1), 2024-12-30
Supplement: Supplementary file 1 [file 7484dfefa4b3b6448a746071.docx]

**Inhibiting CSF1R signaling reduces disc degeneration and discogenic back pain.**

Lei Liu, Jingdong Zhang, Yizheng Yao, Weixuan Yan, Songlin Zhou, Joshua D. Bernstock, Joshua Chalif, Zhimin Li, Feng Tian, Bo Chen, Hong Guo and Yi Lu

**Supplementary figures**

Supplementary Figures S1-S7

**Supplementary figure 1**

**
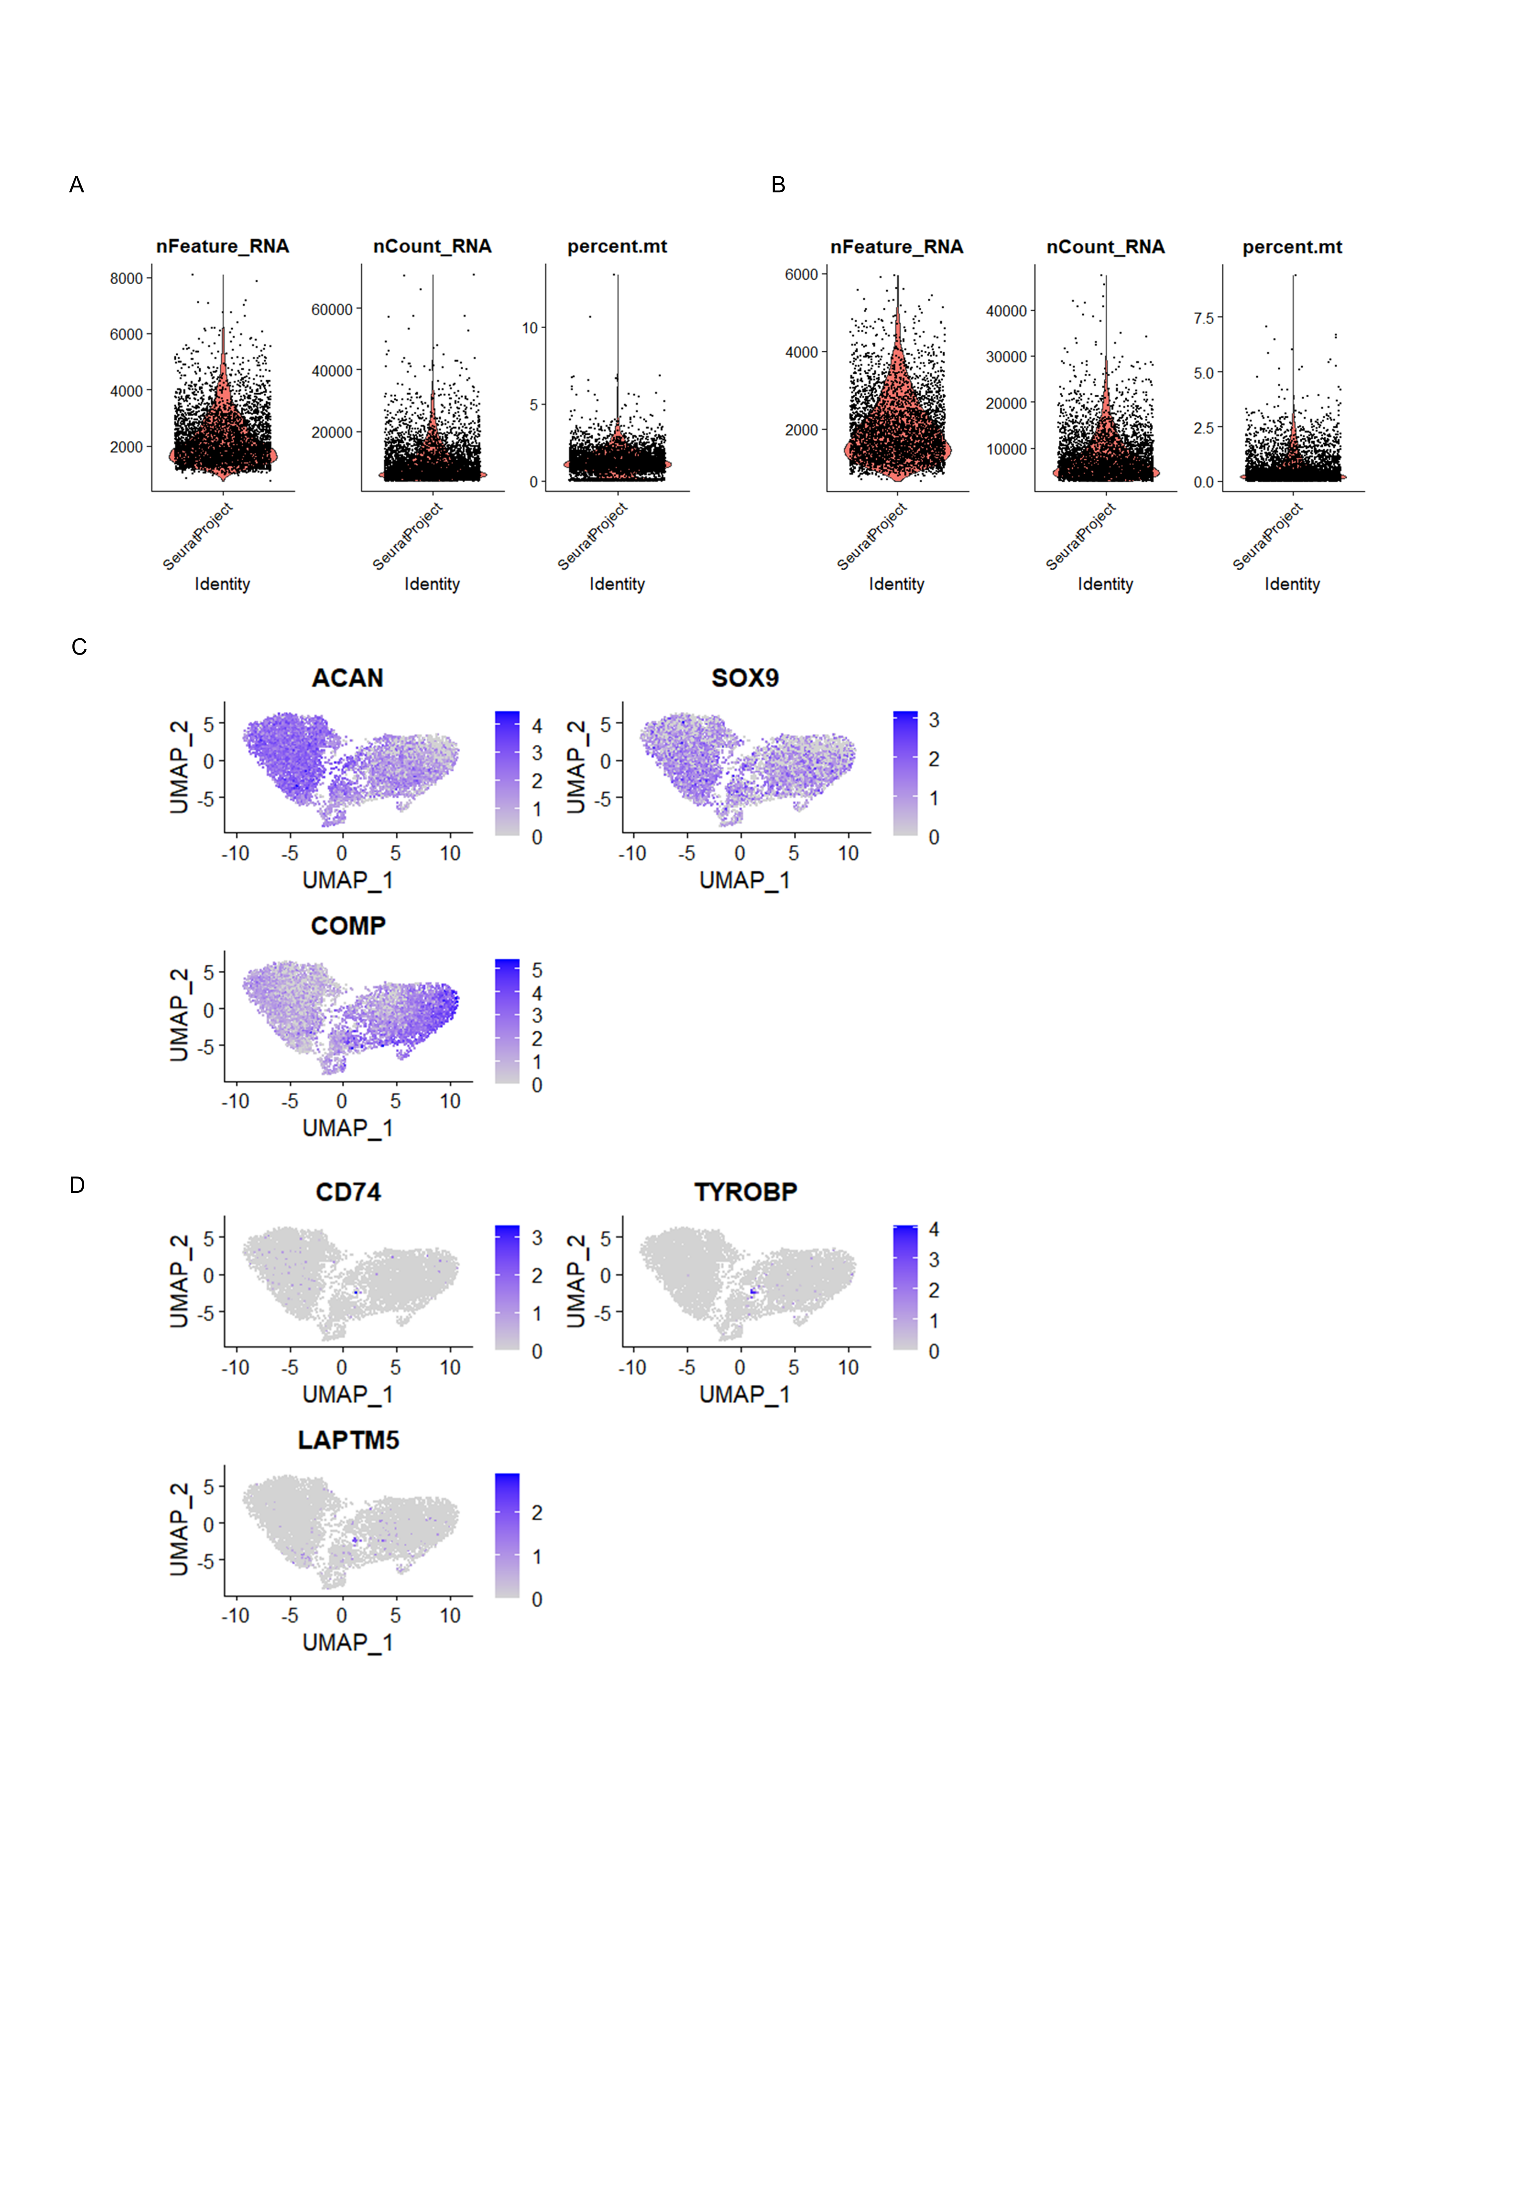
**

**Supplemental Figure 1. Clustering and annotation of cell populations from IVD scRNA database. Related to Figure** **1.** (A and B) Quality control of scRNA-Seq datasets from healthy and degenerated IVD. (C)Feature plots showing expression of selected marker genes of chondrocyte on the UMAP plot. The color scale represents normalized expression for each cell for a given gene. (D) Feature plots showing expression of selected marker genes of macrophage on the UMAP plot. The color scale represents normalized expression for each cell for a given gene.

**
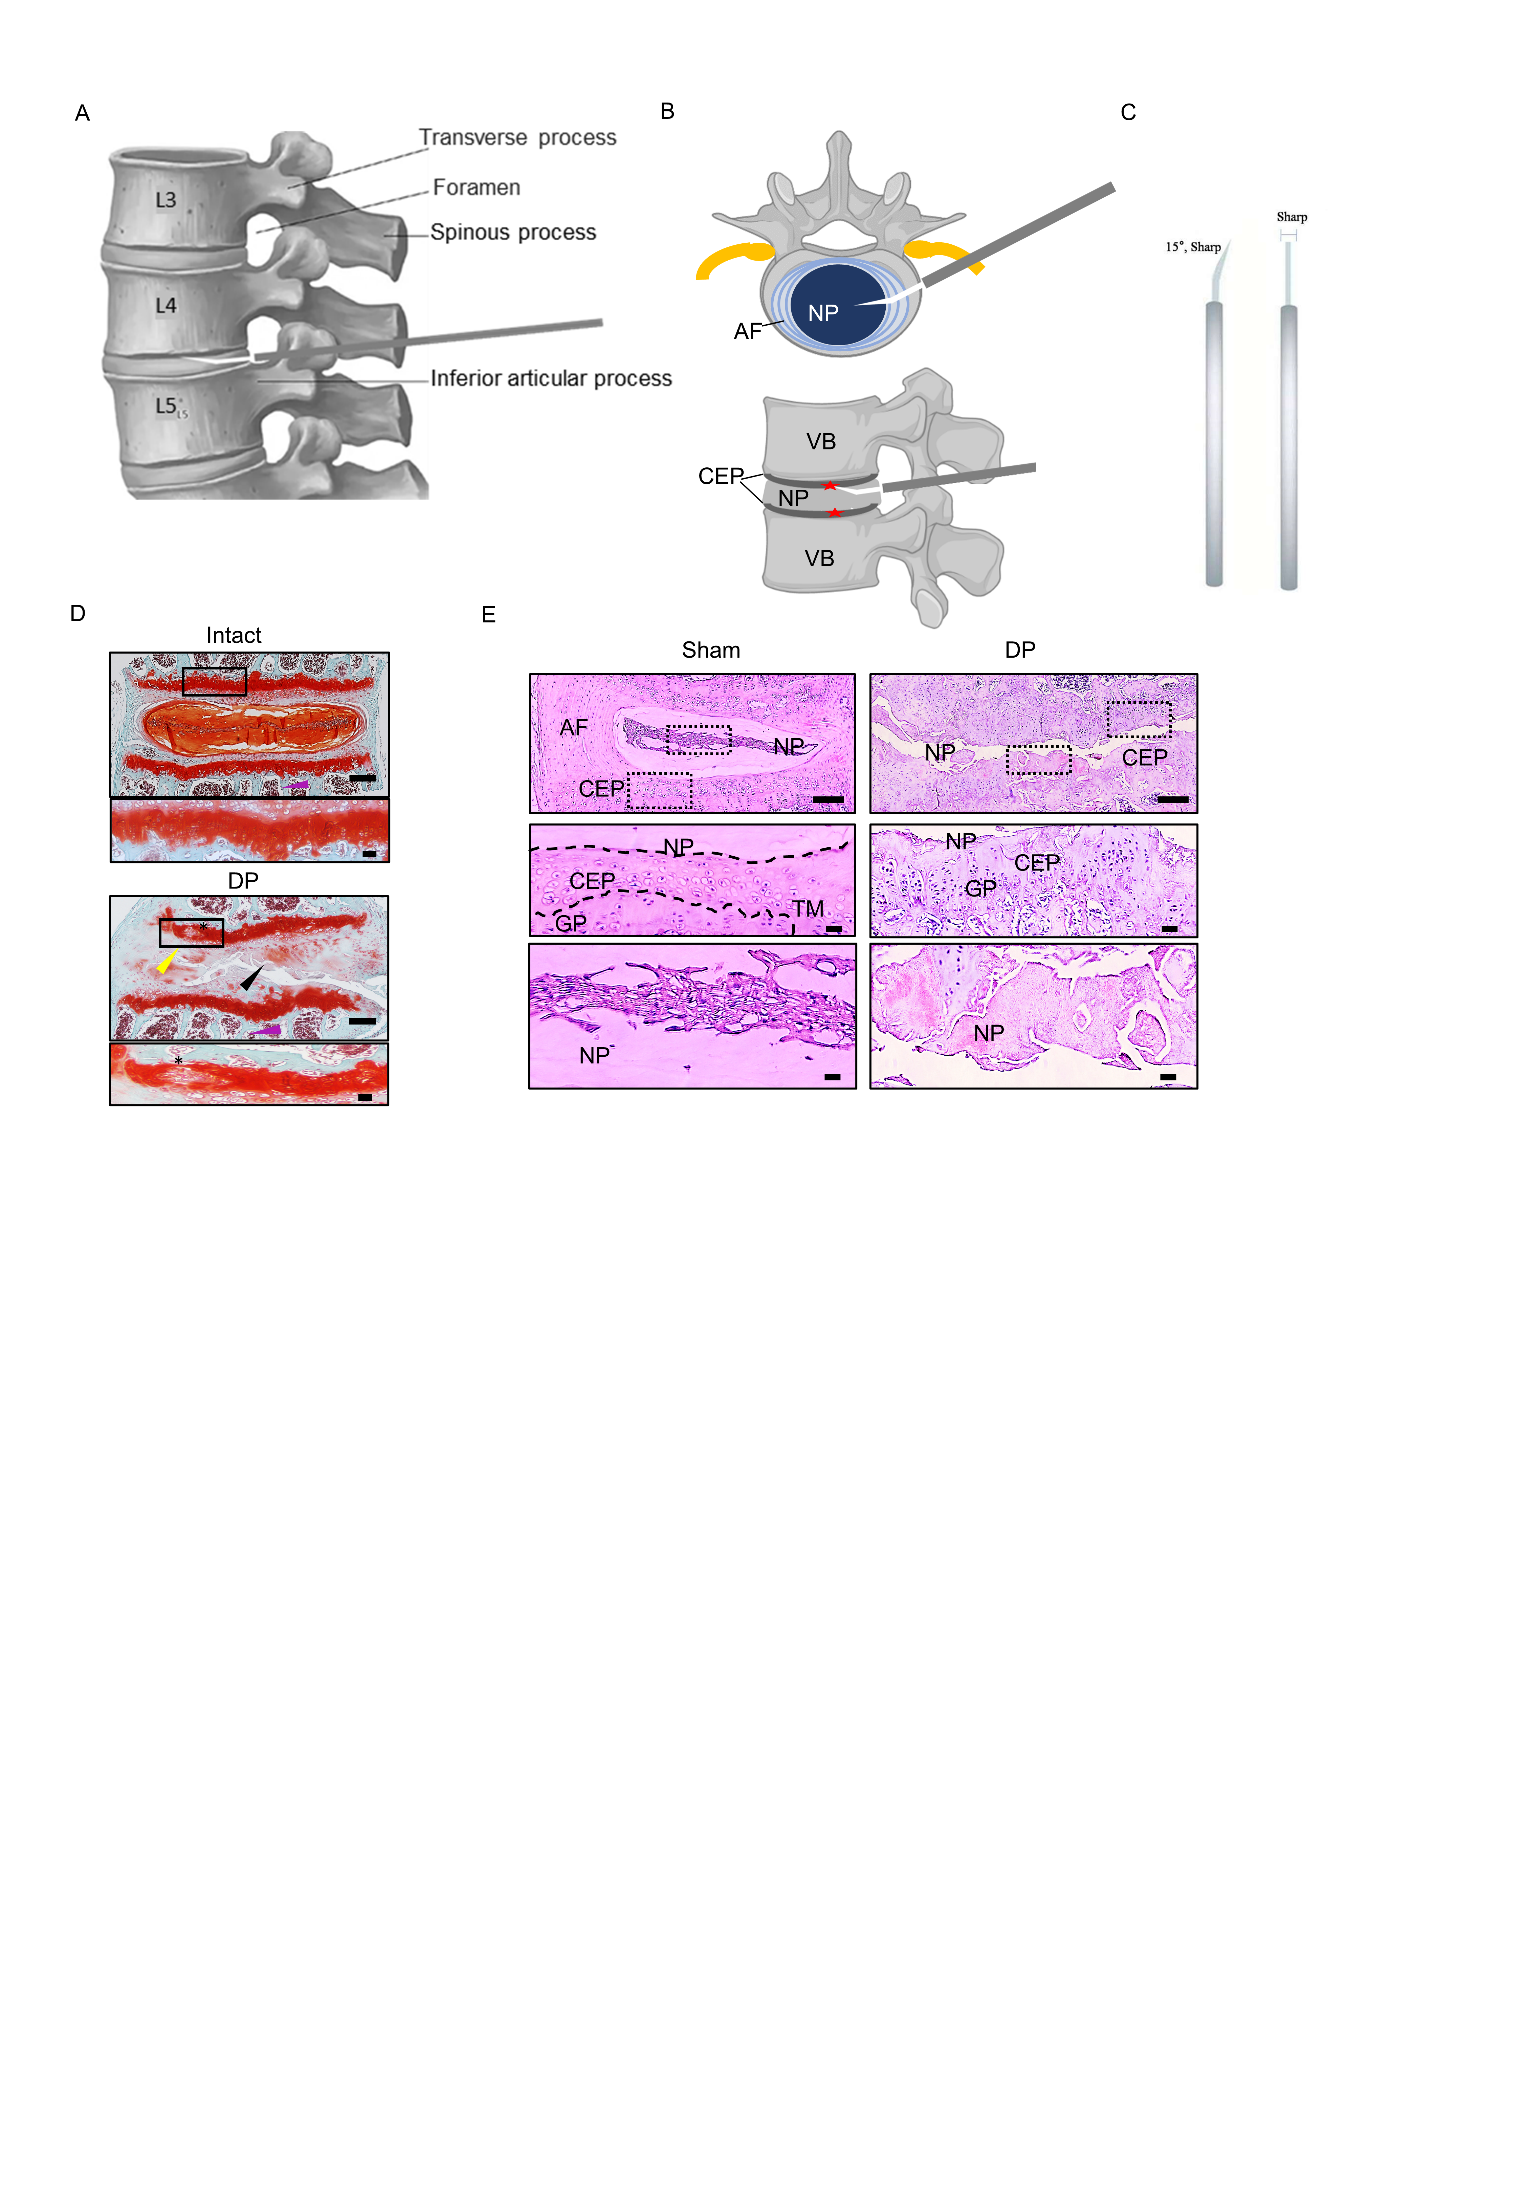
 Supplementary figure 2**

**Supplemental Figure 2.** **Disc injury induced persistent disc degeneration. Related to Figure** **1.** (A and B) In a posterolateral surgical approach, lumbar L4-5 and L5-6 discs were punctured with a 25G needle. Sham operated animals with no IVD injury served as controls. Scale bar = 500 µm. (C) Custom-made tools used in vertebrate endplate damage. (D) Representative histological specimens obtained from L5/6 intervertebral discs of mice from uninjured and DP groups (14 days post injury) at same age. Safranin-O/Fast Green stained sections. Scale bar = 150 µm. magnified images: Scale bar = 60 µm (E) High magnification images(H&E) of the NPs and CEPs obtained from the L5/6 intervertebral discs of uninjured and DP injured mice (180 days post injury) at same age. Scale bar = 150 µm. magnified images: Scale bar = 60 µm.

**Supplemental Figure 3**

**
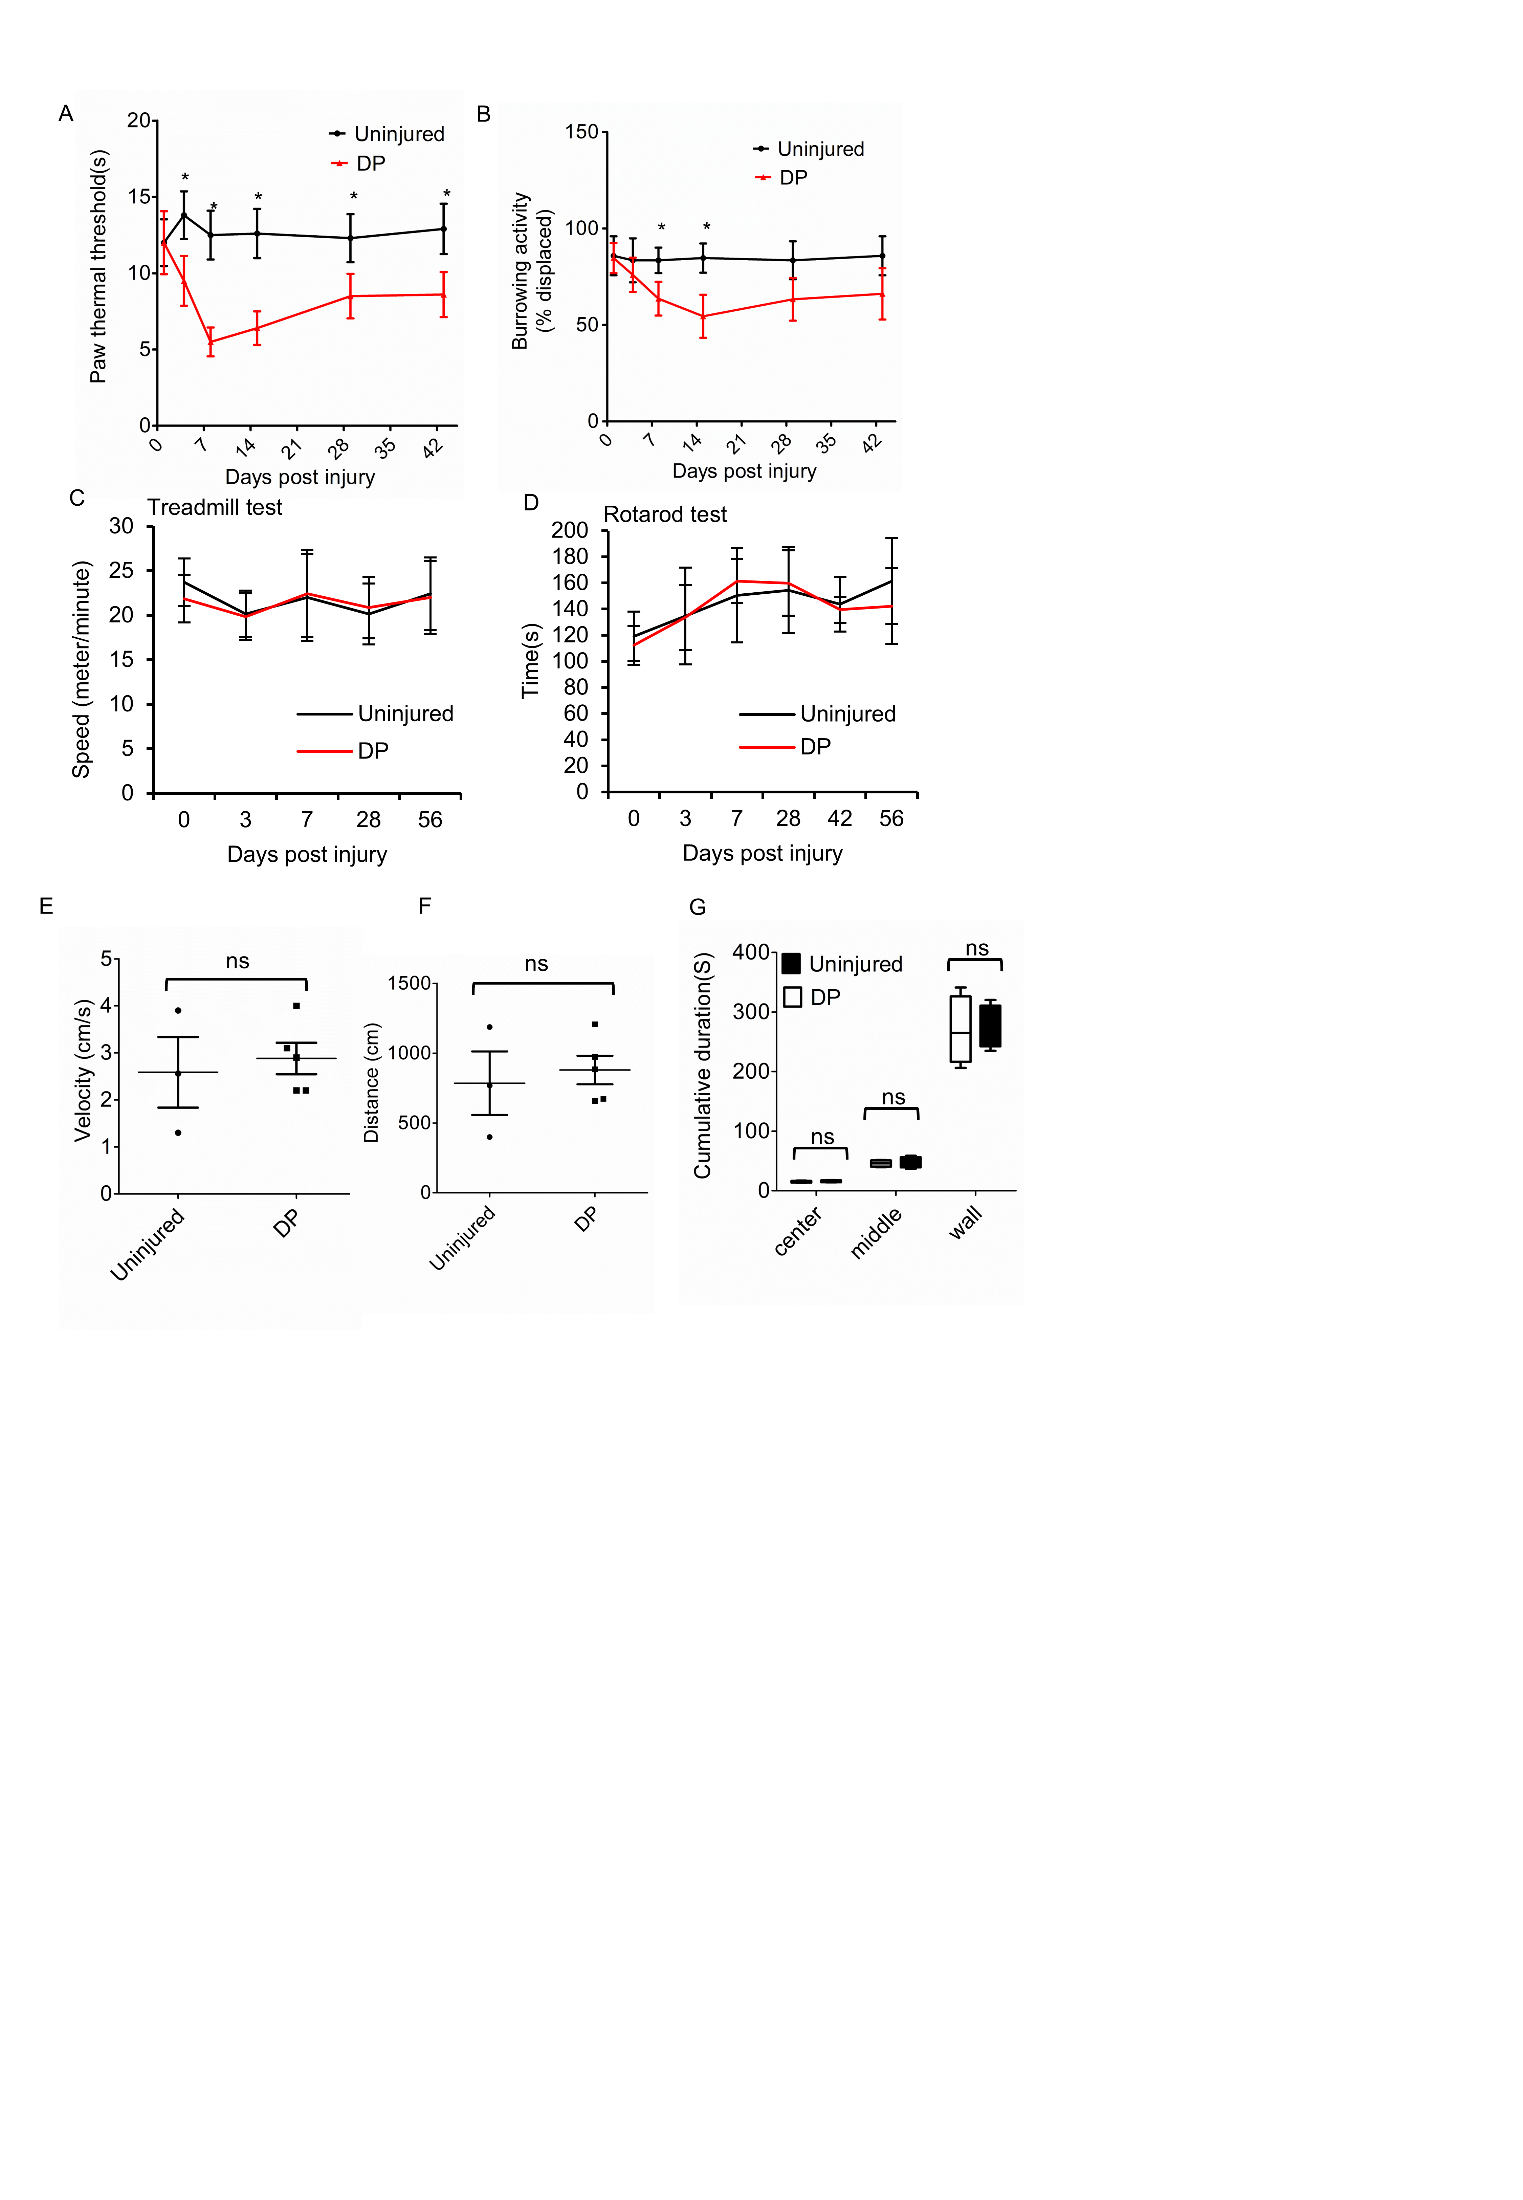
**

**Supplemental Figure 3.** **Disc injury induced behavior changes. Related to Figure** **2** (A)Thermal hyperalgesia was analyzed by the plantar test at indicated time after DP. Data was presented as mean ± SEM. *p < 0.05. n = 10 for each group. (B) Burrowing behavior test was analyzed at indicated time after DP. Data was presented as mean ± SEM. *p < 0.05. n = 10 for each group. (C) Speed tolerance during treadmill walking at pre- and indicated days post DP. No statistical significance. n = 8. (D) Rotor rod test at pre- and indicated days post DP. No statistical significance. n = 7. (E-G) Open field test. The total travelled distance, move velocity and the percentage of time and distance spent in central and peripheral regions were recorded and quantified 28 days post DP. No statistical significance. n = 3-5.

**Supplementary figure 4**


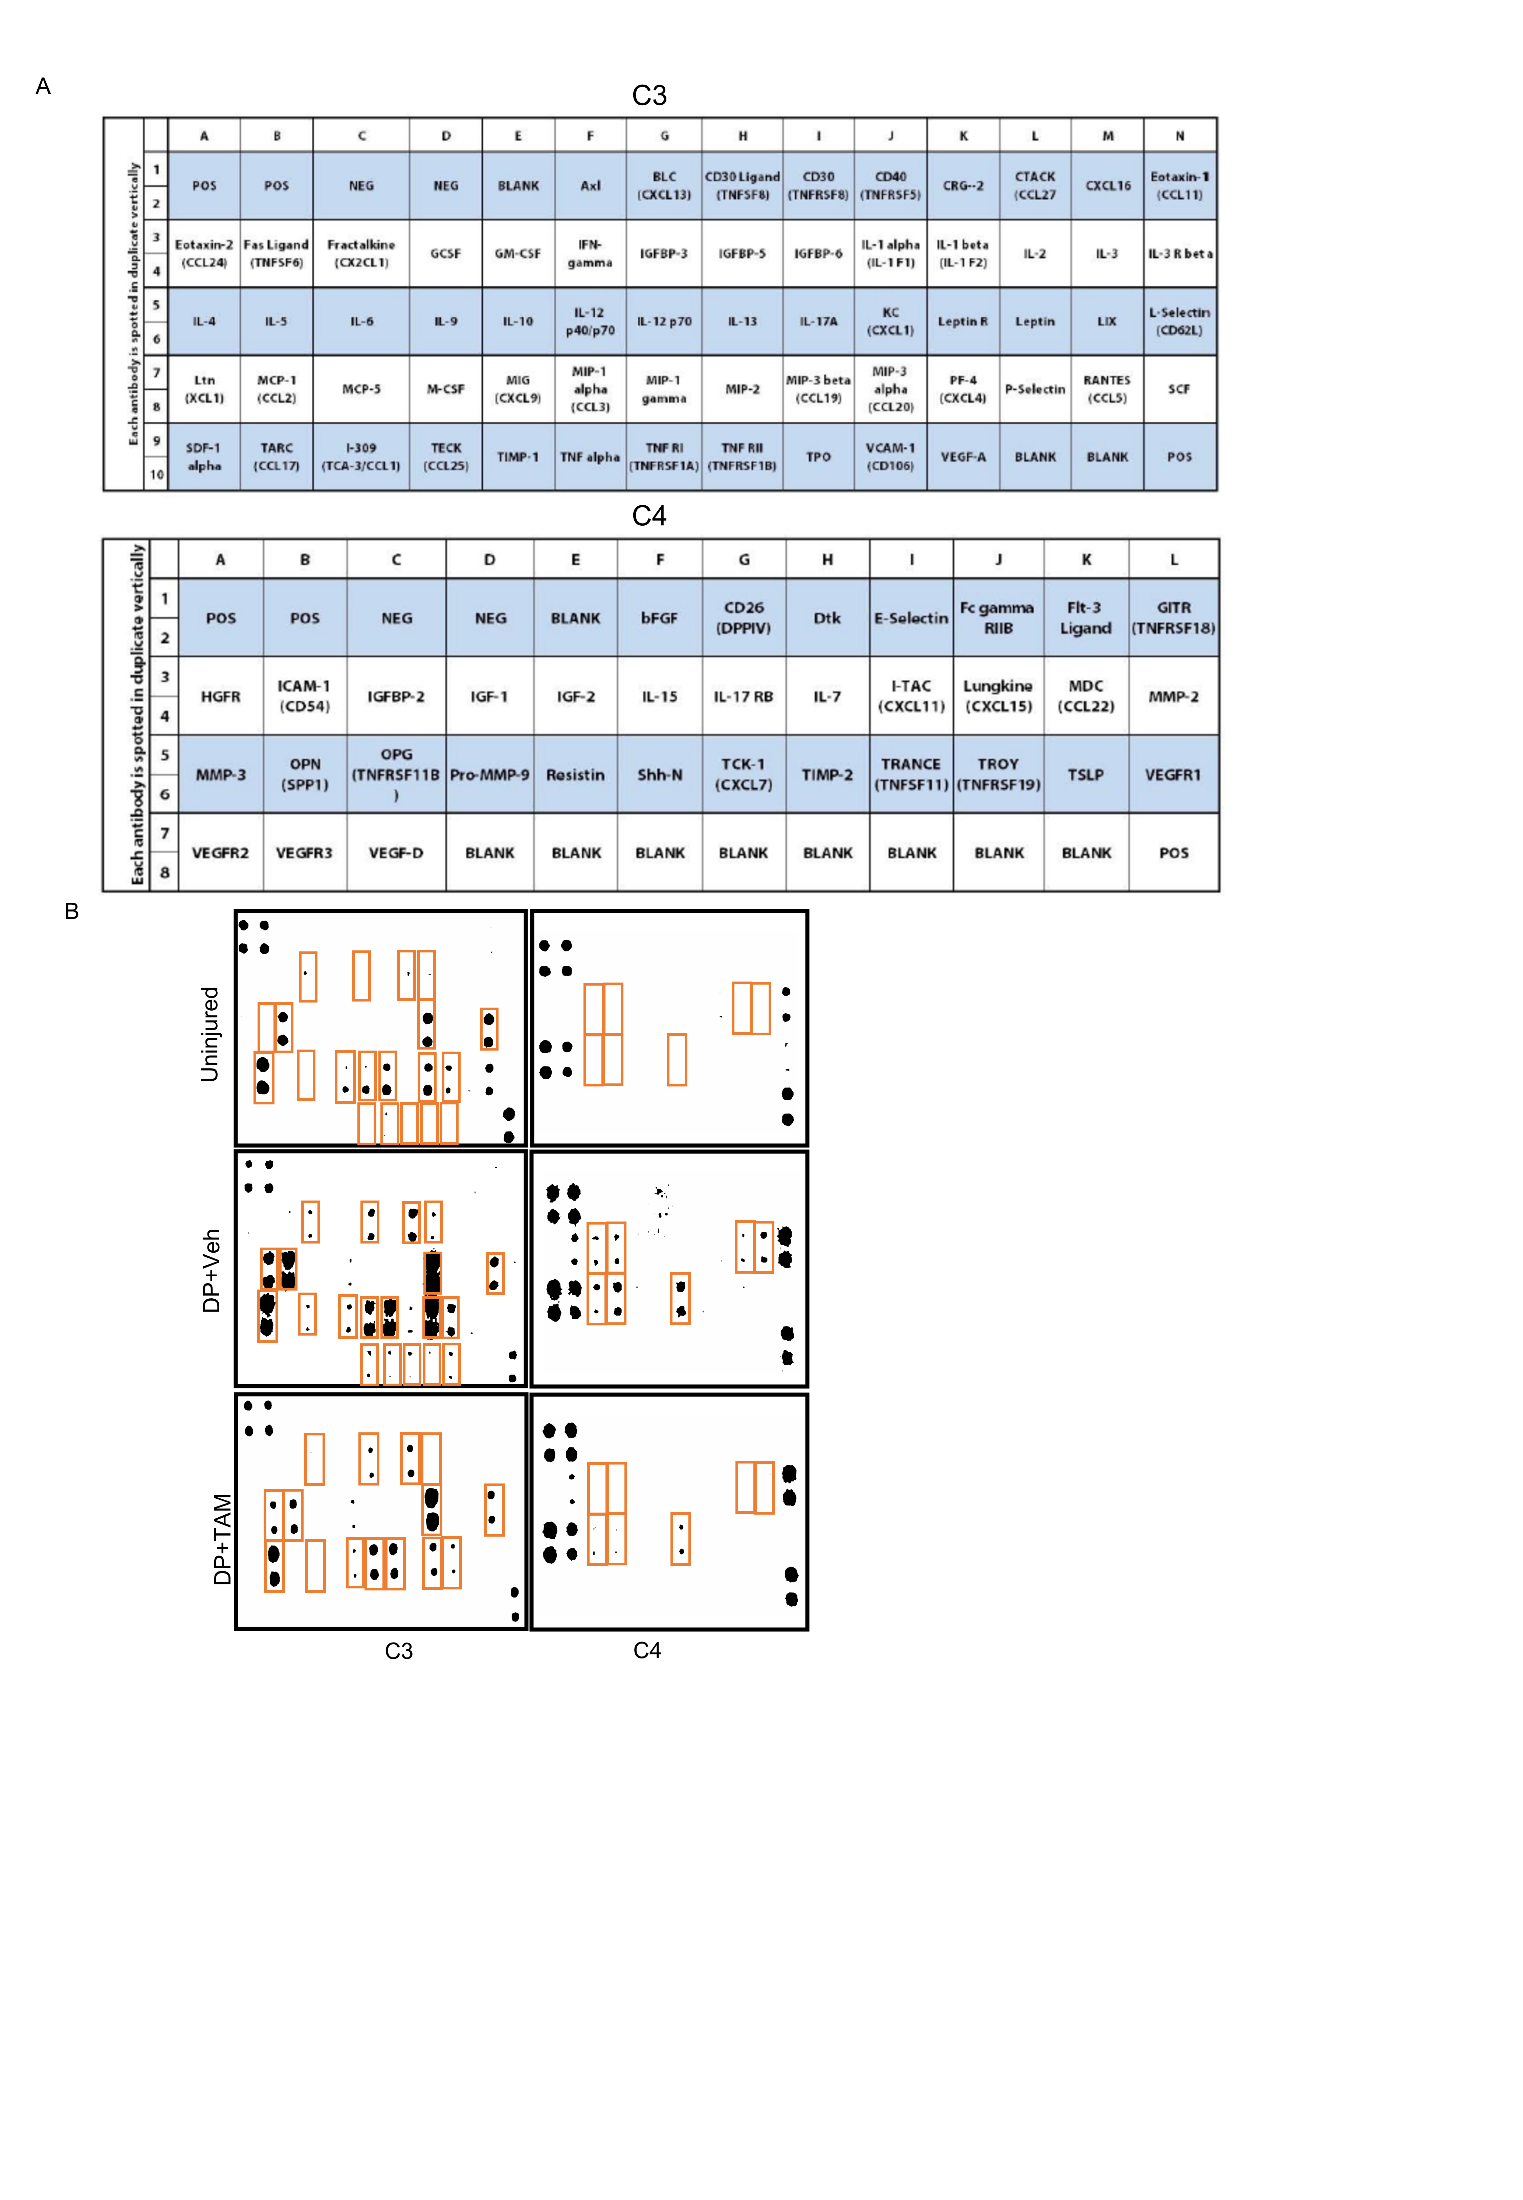


**Supplemental Figure 4.** **CSF1R deletion decreases proinflammatory cytokines release after disc injury. Related to Figure** **3.**  (A) Cytokine detection antibodies chart used for cytokine array experiment. (B)The Cytokine array detected cytokines in the IVD culture medium (Representative membranes were shown for uninjured, DP with vehicle and DP with tamoxifen (*csf1r* deletion). Array images were collected and analyzed using the LI-COR Odyssey Infrared Imaging System.


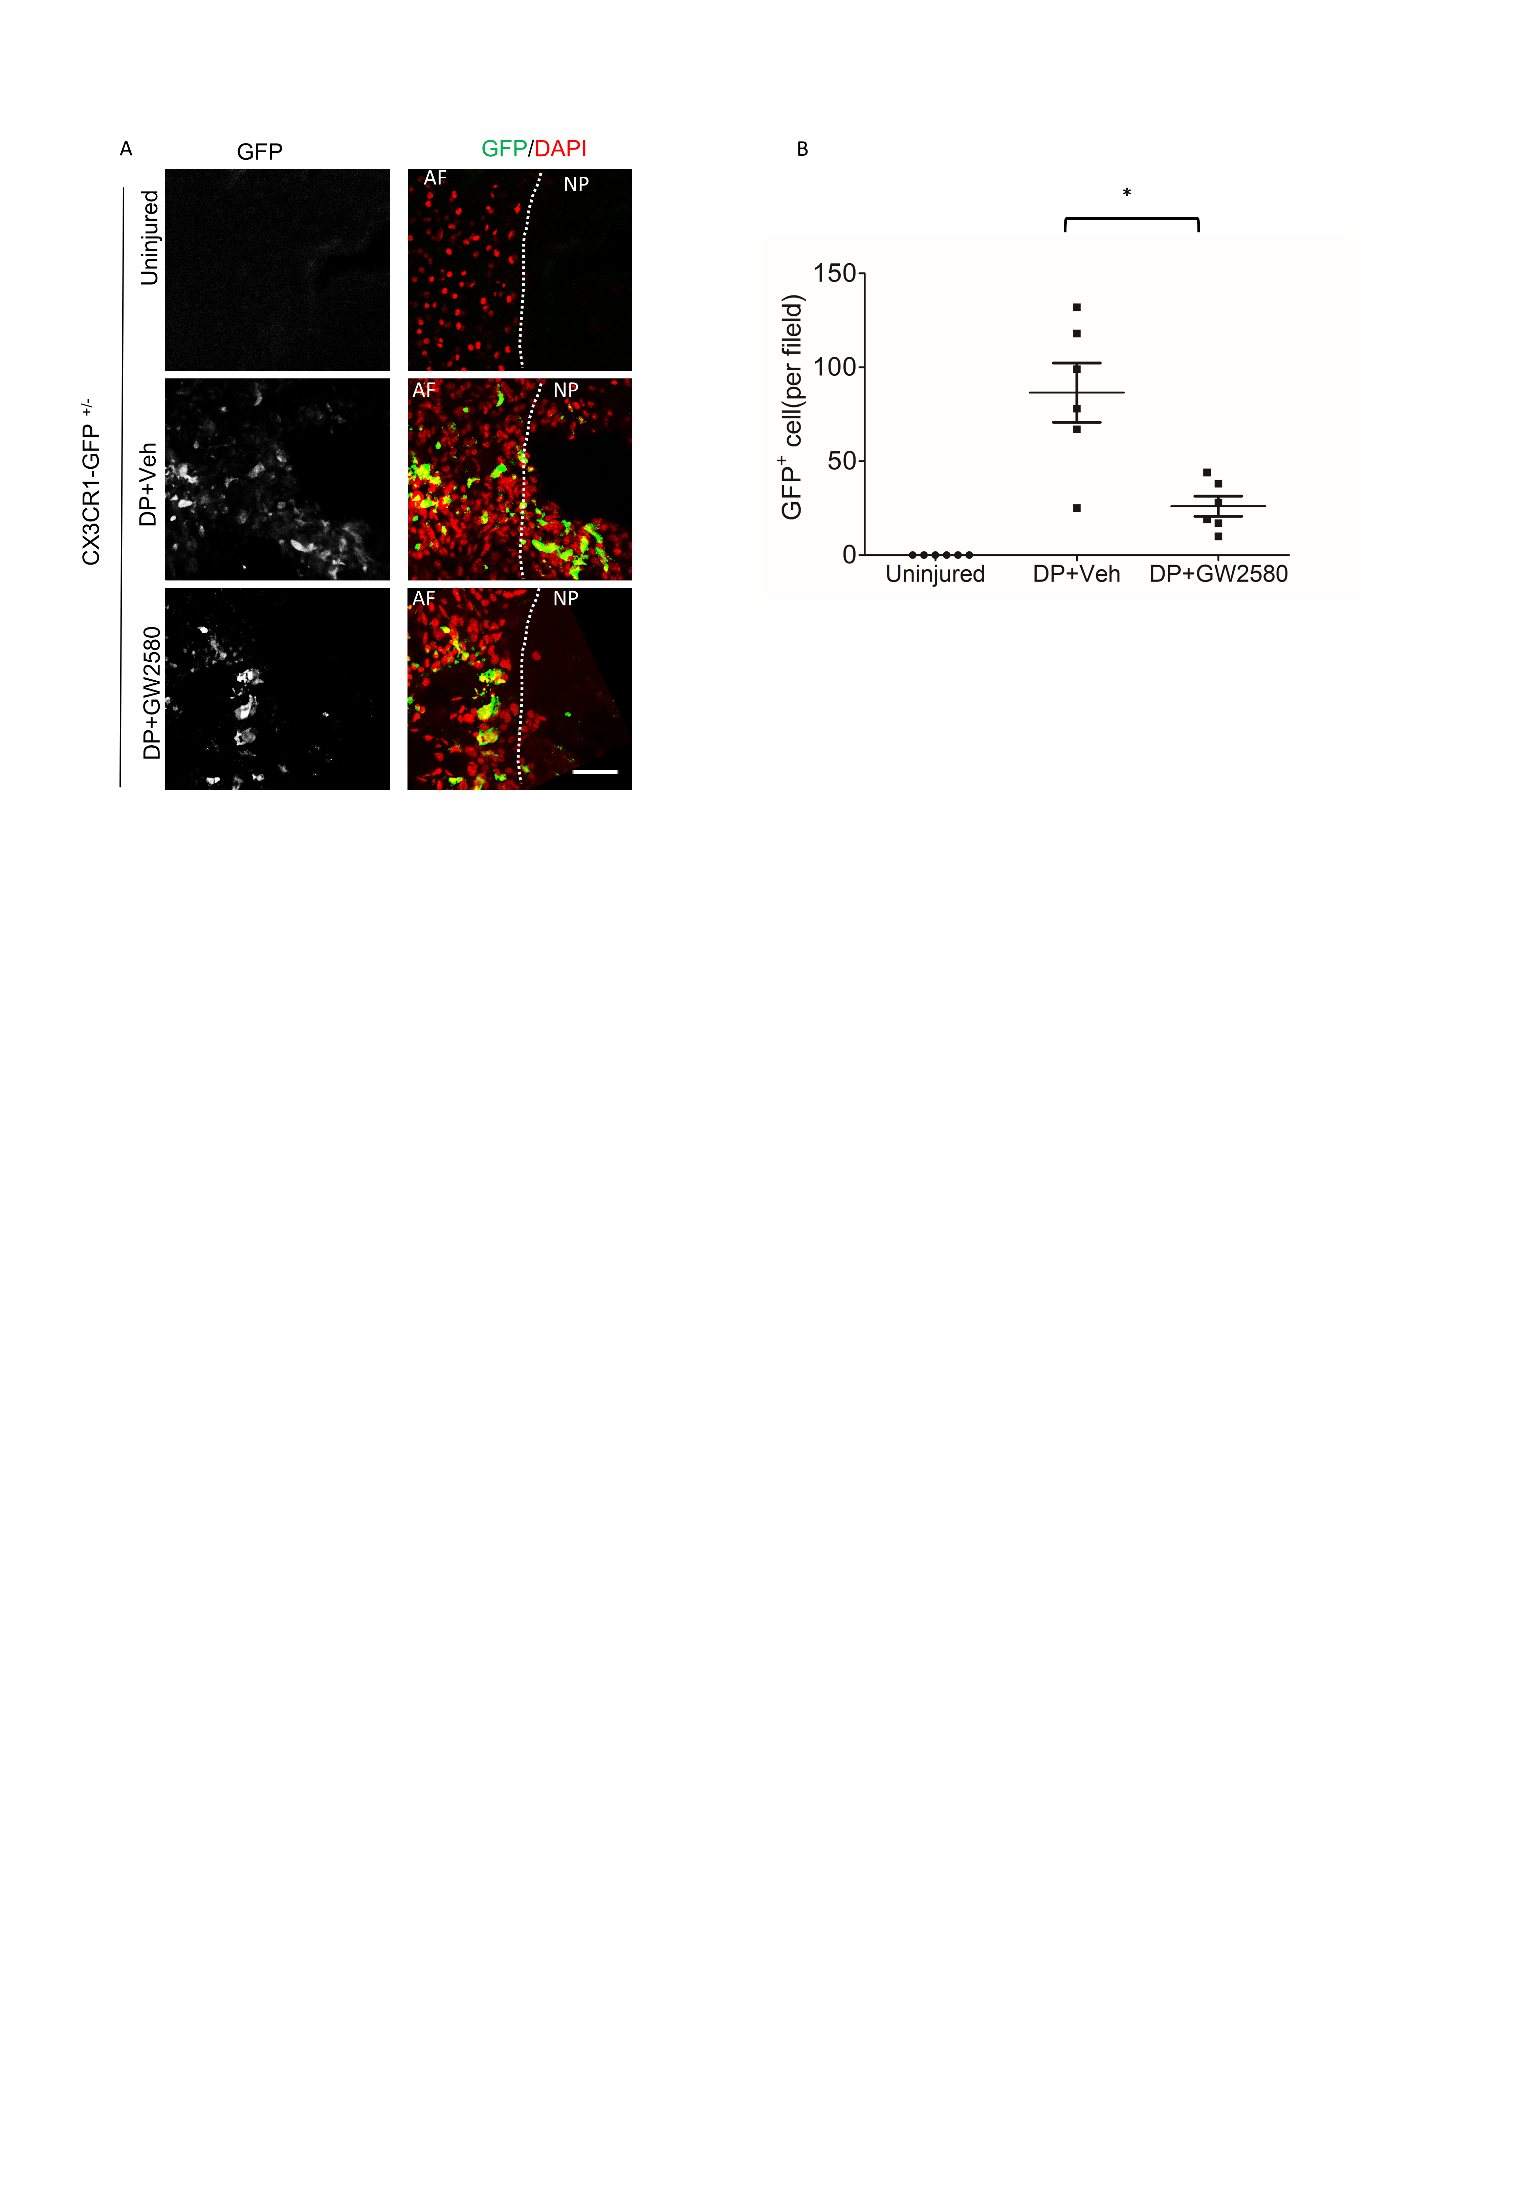
**Supplementary figure** 5

**Supplemental Figure 5 GW2580 alleviated macrophage infiltration after DP.** **Related to Figure** **5.** (A) GFP staining in IVD from Cx3cr1GFP+/-mice. Scale bar: 50µm. (B) Quantification of Cx3cr1-GFP positive cells in inner AF and NP. GFP signal was quantified in uninjured, DP with vehicle and DP with GW2580. n = 6 per group. *p<0.05.

**Supplemental Figure 6**


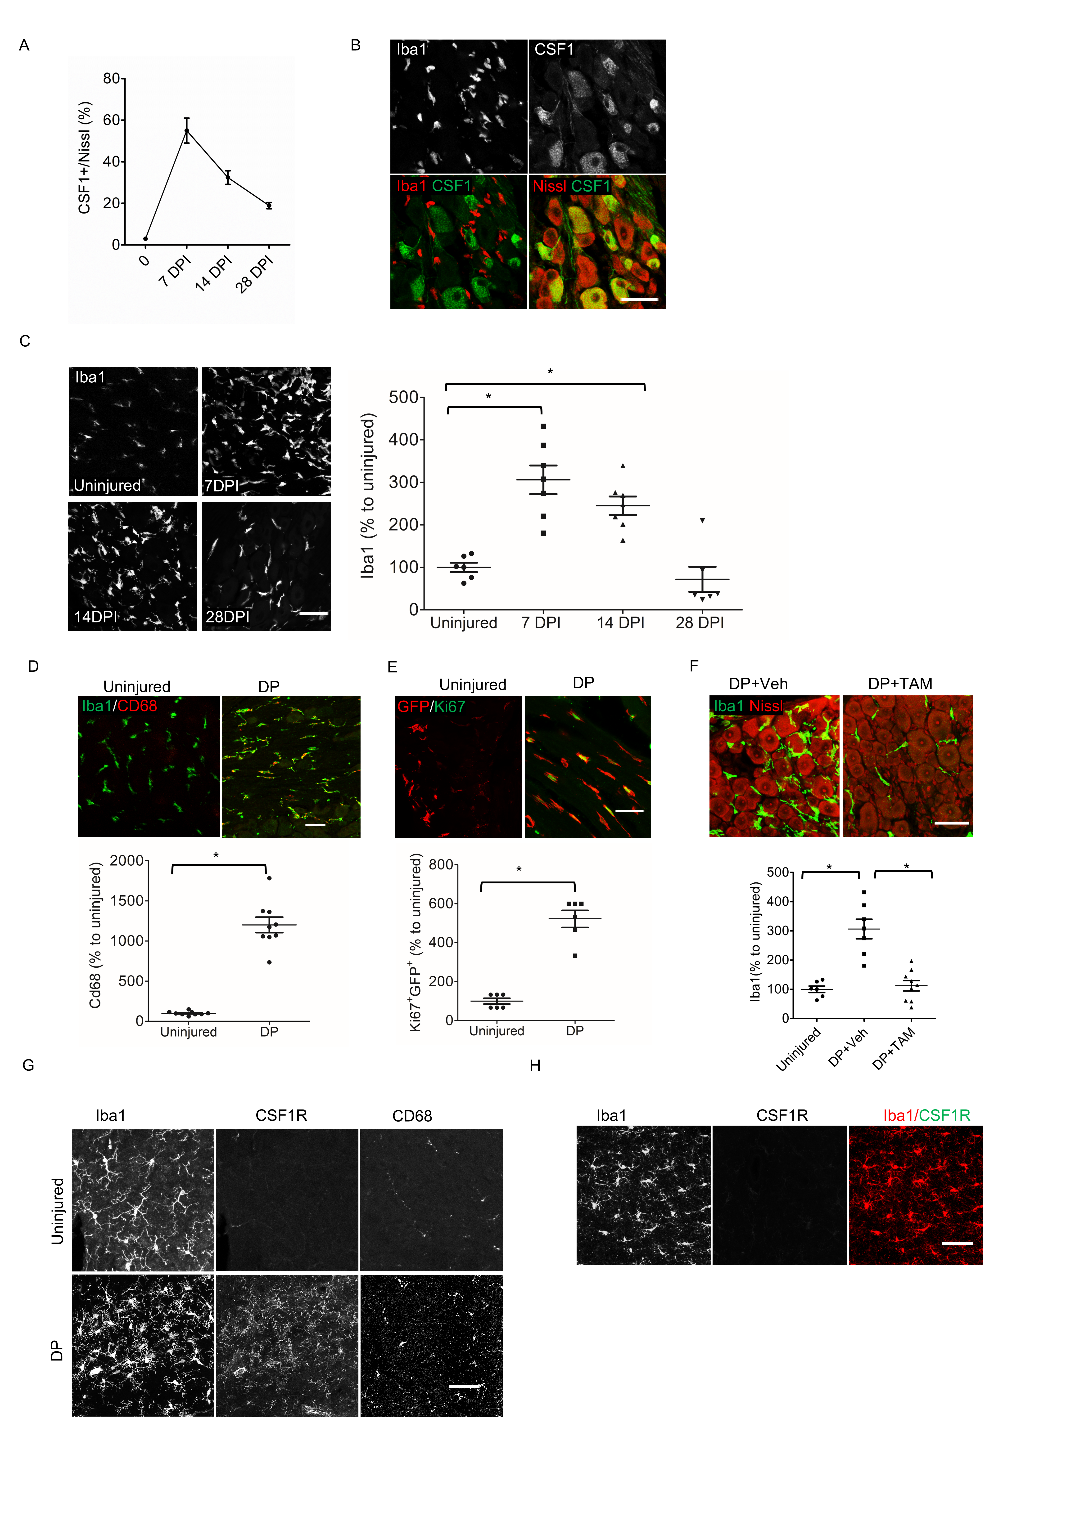


**Supplemental Figure 6** **Disc injury activates DRG macrophage. Related to Figure** **6** (A) Quantification of CSF1/Nissl ratio. n = 5 DRGs per group. (B) Immunostaining of Iba1, CSF1 and Nissl in DRG from DP mice. Scale bar: 50µm. (C) Immunostaining and quantification of Iba1 in DRG from DP mice from different time points. Scale bar: 100µm. Data was presented as mean ± SEM. *p < 0.05. n = 5-6 DRGs (D) Immunostaining and quantification of Iba1 and CD68 in DRG from uninjured and DP mice. Scale bar: 50µm. Data was presented as mean ± SEM. *p < 0.05. n = 8-10. (E) Immunostaining and quantification of Ki67 and GFP in Cx3cr1GFP+/-mice DRG from uninjured and DP mice. Scale bar: 50µm. Data was presented as mean ± SEM. *p < 0.05. n = 6. (F) Immunostaining and quantification of Iba1 in DRG of DP mice from control(Veh) and csf1r deletion(TAM) group. Scale bar: 50µm. Data was presented as mean ± SEM. *p < 0.05. n = 5 DRGs. (G) Immunostaining of spinal cord dorsal horn with Iba1, CD68 and CSF1R from intact and DP mice. Scale bar: 50µm. (H) Immunostaining of spinal cord dorsal horn with Iba1 and CSF1R from csf1r deletion mice after DP. Scale bar: 50µm

**
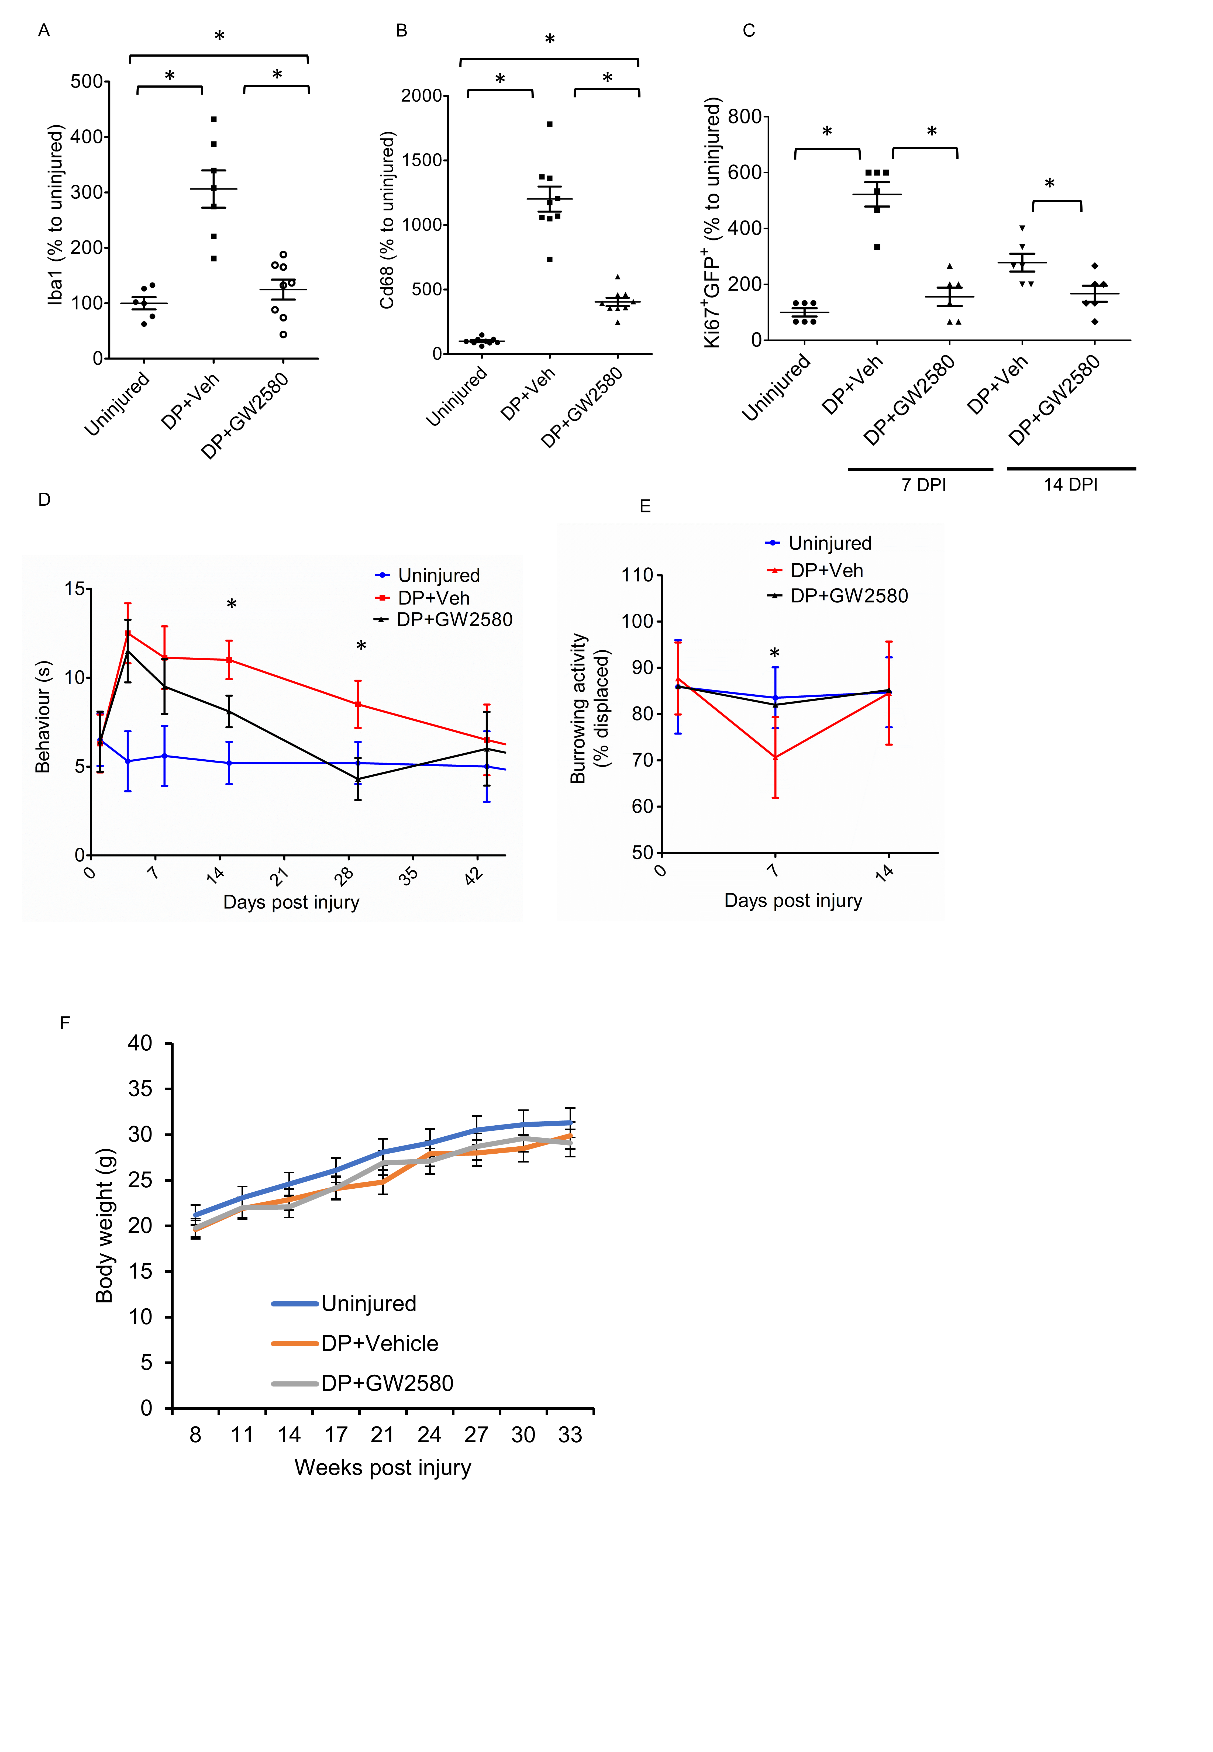
Supplemental Figure 7**

**Supplemental Figure 7.** **GW2580 alleviated behavior changes after DP. Related to Figure** **7.**

(A-B) Iba1(A) and CD68(B) quantification in DRG from vehicle or GW2580 treated DP mice(14DPI). Data was presented as mean ± SEM. *p < 0.05. n = 5 DRGs. (C) Ki67 and GFP quantification in Cx3cr1GFP+/-mice DRG from vehicle or GW2580 treated DP mice. Data was presented as mean ± SEM. *p < 0.05. n = 6 DRGs. (D) Cold allodynia was analyzed by the plantar test at indicated time in uninjured, DP with vehicle and DP with GW2580. Data was presented as mean ± SEM. *p < 0.05. n = 10 for each group. (E) Burrowing behavior test was analyzed at indicated time after DP. Data was presented as mean ± SEM. *p < 0.05. n = 8 for each group. (F) Mice body weight. Data was presented as mean ± SEM. *p < 0.05. n = 10-12 for each group.
